# Supplementary material for: Synergistic Combination of Polymyxin B and Enrofloxacin Induced Metabolic Perturbations in Extensive Drug-Resistant Pseudomonas aeruginosa
Source: Front Pharmacol. 2019 Oct 3;10:1146. doi: 10.3389/fphar.2019.01146 (PMC6785843; doi:10.3389/fphar.2019.01146)
Supplement: Supplementary file 1 [file DataSheet_1.xlsx]

## Sheet: Supplementary Data
Supplementary Table 1: Signficiant metabolites identified in Pseudomonas aeruginosa 12196 at 1 h following treatments with polymyxin B, enrofloxacin, and the combination. Metabolites confirmed by authentic standards were highlighted in yellow. Significant fold-changes are highlighed in red. One-way ANOVA for multiple comparison (q ≤ 0.05; |log2(fold change)| ³ 1).
MASS	RETENSION TIME	METABOLITE	CONFIDENCE	MAP	PATHWAY	Log2(fold change)
						Polymyxin B	Enrofloxacin	Combination	q-value
89.0477	14.8476	beta-Alanine	10	Nucleotide Metabolism	Pyrimidine metabolism	0.030481	-0.146454	-1.24518	0.00031507
89.0477	14.4166	L-Alanine	10	Amino Acid Metabolism	Alanine and aspartate metabolism	0.495686	-0.0464294	1.08154	0.00011682
90.0316	9.76753	(S)-Lactate	8	Carbohydrate Metabolism	Glycolysis / Gluconeogenesis	-2.05276	-0.306577	-1.18878	0.0050557
97.9769	16.7363	Orthophosphate	5	Energy Metabolism	Oxidative phosphorylation	-0.663075	-0.0502602	-0.792856	0.0059288
112.016	12.8913	2-Furoate	5	Undefined	Undefined	-2.72896	0.0391054	-1.91575	0.001013
117.079	10.6743	L-Valine	8	Amino Acid Metabolism	Valine, leucine and isoleucine degradation	-0.272374	0.155897	-0.694903	0.024747
123.032	7.72201	Nicotinate	10	Metabolism of Cofactors and Vitamins	Nicotinate and nicotinamide metabolism	0.686461	0.194776	1.44181	0.048922
125.048	7.62864	N-Ethylmaleimide	7	Undefined	Undefined	0.470437	-0.0918142	1.277	0.018123
126.043	7.17273	Thymine	10	Nucleotide Metabolism	Pyrimidine metabolism	0.320777	1.10995	2.11305	0.00014006
127.063	5.03472	delta1-Piperideine-2-carboxylate	7	Amino Acid Metabolism	Lysine degradation	-0.0599359	-0.629736	0.341907	0.045575
130.111	20.2239	N-Acetylputrescine	10	Amino Acid Metabolism	Arginine and proline metabolism	-0.619699	0.0178991	-0.925694	0.0026156
131.058	13.4544	5-Aminolevulinate	10	Amino Acid Metabolism	Glycine, serine and threonine metabolism	-0.375358	0.217345	-0.423085	0.0084811
132.054	12.0064	3-Ureidopropionate	10	Nucleotide Metabolism	Pyrimidine metabolism	0.588913	-0.0600225	-0.896159	0.0009686
133.074	13.6704	1-deoxyxylonojirimycin	5	Undefined	Undefined	-0.453336	0.0724116	-0.848227	0.010407
139.027	10.8196	6-Hydroxynicotinate	9	Metabolism of Cofactors and Vitamins	Nicotinate and nicotinamide metabolism	1.12559	0.309248	1.23221	0.035897
143.058	11.3538	5-ethyl-5-methyl-2,4-oxazolidinedione	5	Undefined	Undefined	0.448482	0.0805352	2.02401	0.0018178
146.069	10.7011	D-Glutamine	7	Amino Acid Metabolism	D-Glutamine and D-glutamate metabolism	-0.00529248	0.0708379	-1.28122	0.0012132
147.053	14.5567	L-Glutamate	10	Amino Acid Metabolism	Arginine and proline metabolism	-0.803689	0.182275	-0.954151	0.0038911
151.049	16.5511	8-Hydroxyadenine	5	Undefined	Undefined	-1.62101	0.159038	-1.64937	0.000245
151.05	12.0836	2-Hydroxyadenine	7	Undefined	Undefined	-1.10157	0.451795	-0.253991	0.023398
161.069	14.706	L-2-Aminoadipate	8	Amino Acid Metabolism	Lysine biosynthesis and degradation	-1.1771	-0.00383795	-0.926928	0.0044464
161.069	9.23128	L-Glutamate methylester	7	Undefined	Undefined	-0.205814	0.0468175	-0.447544	0.04914
169.998	15.2522	Glycerone phosphate	8	Carbohydrate Metabolism	Glycolysis / Gluconeogenesis	-0.552208	-0.19681	-0.511604	0.036123
173.105	4.608	Hexanoylglycine	7	Undefined	Undefined	-0.729227	0.32465	-0.871158	0.012801
174.064	14.4236	N-Formimino-L-glutamate	8	Amino Acid Metabolism	Histidine metabolism	-0.681726	0.222292	-0.806425	0.0048266
174.1	14.5987	N5-Ethyl-L-glutamine	7	Undefined	Undefined	-0.744213	0.338034	-0.636136	0.0011397
175.048	14.7965	N-Acetyl-L-aspartate	9	Amino Acid Metabolism	Alanine and aspartate metabolism	-0.571243	0.332323	-0.836231	0.0074481
175.085	12.4692	Calystegin B2	7	Undefined	Undefined	-0.501218	0.210219	-1.08457	0.0052885
179.081	17.809	N1-hydroxyethyladenine	5	Undefined	Undefined	-0.710204	-0.00290107	-1.686	0.0029216
185.993	16.943	3-Phospho-D-glycerate	8	Carbohydrate Metabolism	Glycolysis / Gluconeogenesis	-0.644858	-0.0393098	-0.375463	0.015691
187.048	12.9577	2-(Acetamidomethylene)succinate	7	Metabolism of Cofactors and Vitamins	Vitamin B6 metabolism	-0.774935	0.0821753	-1.01346	0.028807
188.08	10.4798	N-Acetylglutamine	7	Undefined	Undefined	-1.29875	0.207909	-1.34611	0.034034
188.116	12.1078	6-Acetamido-3-aminohexanoate	7	Undefined	Undefined	-0.281743	0.0845501	-0.39518	0.0080737
189.111	14.6263	L-Homocitrulline	7	Undefined	Undefined	-0.701553	0.171921	-0.695845	0.015619
191.062	9.37069	N-Acetylmethionine	7	Undefined	Undefined	0.227789	0.122001	-0.966369	0.0099864
192.063	14.6178	5D-5-O-Methyl-2,3,5/4,6-pentahydroxycyclohexanone	5	Undefined	Undefined	-0.632383	0.0423765	-0.674497	0.011047
194.043	14.8118	D-Galacturonate	7	Carbohydrate Metabolism	Pentose and glucuronate interconversions	2.7018	0.144384	2.44846	0.00014006
195.075	16.7681	2-Amino-2-deoxy-D-gluconate	9	Carbohydrate Metabolism	Pentose phosphate pathway	-1.60972	0.142463	-1.01334	0.00026256
195.076	12.4552	2-Amino-4-hydroxy-6-hydroxymethyl-7,8-dihydropteridine	8	Metabolism of Cofactors and Vitamins	Folate biosynthesis	0.33991	0.146434	-0.682767	0.019669
197.08	10.0009	N-Acetyl-L-histidine	7	Undefined	Undefined	-0.478093	0.128871	-0.782576	0.0032161
197.117	11.4619	Hercynine	7	Amino Acid Metabolism	Histidine metabolism	-0.153082	0.13709	-0.463496	0.036634
203.079	14.4511	N2-Acetyl-L-aminoadipate	7	Amino Acid Metabolism	Lysine biosynthesis	1.19747	-0.250952	0.841287	0.024192
203.079	12.8768	2-acetamidoglucal	5	Undefined	Undefined	0.400244	0.14304	2.07887	0.0018178
203.08	11.3498	N2-Acetyl-L-aminoadipate	5	Amino Acid Metabolism	Lysine biosynthesis	0.474244	0.146204	2.17762	0.0008103
203.127	16.6425	Lys-Gly	5	Peptide(di-)	Basic peptide	-0.930281	0.00227069	0.731489	0.024024
205.095	9.57438	N-Acetyl-D-fucosamine	7	Undefined	Undefined	-0.945593	0.162728	-1.09848	0.0038669
216.111	12.681	gamma-glutamyl-gamma-butyraldehyde	7	Undefined	Undefined	0.0567552	0.230386	-0.336588	0.029642
217.143	16.0833	beta-Alanyl-L-lysine	7	Amino Acid Metabolism	beta-Alanine metabolism	-0.722436	0.197563	0.765401	0.028807
218.09	15.0586	gamma-L-Glutamyl-D-alanine	7	Peptides	Undefined	-0.70793	0.0269739	-0.487813	0.012494
219.111	8.493	Pantothenate	10	Amino Acid Metabolism	Pantothenate and CoA biosynthesis	-0.765763	0.131218	-1.027	0.0012532
221.09	11.3521	N-Acetyl-D-glucosamine	6	Amino Acid Metabolism	Glutamate metabolism__Aminosugars metabolism	0.517012	0.132806	2.18397	0.00081535
227.091	9.89258	Deoxycytidine	8	Nucleotide Metabolism	Pyrimidine metabolism	0.095529	0.723146	1.58163	0.0018178
229.088	14.524	Ergothioneine	7	Amino Acid Metabolism	Histidine metabolism	-0.930803	0.223352	-1.26189	0.00034949
230.019	15.5823	D-Ribose 5-phosphate	10	Carbohydrate Metabolism	Pentose phosphate pathway	-1.02154	-0.0749216	-0.721418	0.0018178
237.085	12.9123	N-Acetyl-D-glucosaminate	5	Undefined	Undefined	-2.1909	0.0565962	-1.68749	0.00013618
238.107	9.3774	quinonoid dihydro-(6H)-biopterin	7	Undefined	Undefined	0.31433	0.0754076	-0.164399	0.008492
242.091	7.1709	Thymidine	7	Nucleotide Metabolism	Pyrimidine metabolism	0.261061	1.1316	1.96209	0.0010054
243.162	4.17699	Isobutylphendienamide	7	Undefined	Undefined	10.3128	1.98339	10.0375	0.0019535
247.08	13.2892	Aspartyl-Asparagine	5	Peptides	Undefined	-0.249038	0.116781	1.0807	0.040599
253.081	14.1471	Neopterin	7	Metabolism of Cofactors and Vitamins	Folate biosynthesis	-0.451542	0.348644	-1.08638	0.0001316
259.046	16.1003	alpha-D-Glucosamine 1-phosphate	6	Carbohydrate Metabolism	Aminosugars metabolism	-1.77133	0.131665	-1.16381	0.0001316
259.157	4.06411	2-Heptyl-4-hydroxyquinoline-N-oxide	5	Undefined	Undefined	8.58448	0	7.54292	4.6072e-08
260.03	16.6996	Hexose phosphate	7	Carbohydrate Metabolism	0	-0.985835	0.0437916	-1.14207	0.00010828
275.1	7.77819	Cardiospermin	7	Undefined	Undefined	0.524855	0.212175	1.73672	0.0097228
275.1	6.42011	Sarmentosin	7	Undefined	Undefined	0.734987	0.427539	2.91059	0.034872
275.148	16.38	Epsilon-(gamma-Glutamyl)-lysine	7	Undefined	Undefined	-0.85234	0.109439	1.01653	0.011047
276.096	17.2381	Glu-Glu	7	Peptide(di-)	Acidic peptide	-1.7287	0.11819	-1.77339	0.010407
278.13	4.6705	Pantetheine	7	Metabolism of Cofactors and Vitamins	Pantothenate and CoA biosynthesis	-0.174412	0.187668	-0.969404	0.032202
283.193	3.98138	Levallorphan	5	Undefined	Undefined	8.5687	0	7.8344	1.3269e-07
287.159	12.8686	Arginyl-Hydroxyproline	5	Peptides	Undefined	1.85097	-0.377658	2.11072	0.032961
289.127	12.9764	Ophthalmicacid	9	Undefined	Undefined	-0.993649	0.190236	-0.981512	0.015691
290.04	16.3408	D-Sedoheptulose 7-phosphate	6	Carbohydrate Metabolism	Pentose phosphate pathway	-1.29483	0.00556348	-1.52475	0.00041827
290.041	12.9181	Sedoheptulose 1-phosphate	5	Energy Metabolism	Carbon fixation	-6.60535	0.074834	-1.69993	1.5848e-07
293.111	9.98394	N-Acetylmuramate	6	Undefined	Undefined	0.724581	0.443597	4.19142	1.1775e-05
294.219	3.6403	FA hydroxy(18:1)	7	Lipids: Fatty Acyls	Fatty Acids and Conjugates	-0.0900208	0.0396229	-0.727238	0.018123
297.09	7.16743	5'-Methylthioadenosine	10	Amino Acid Metabolism	Arginine and proline metabolism	-1.61774	0.0689886	-1.89095	0.0018692
299.225	3.8621	2-Undecyl-4(1H)-quinolinone	5	Undefined	Undefined	10.7337	0	10.3858	2.054e-09
301.056	14.4323	N-Acetyl-D-glucosamine 6-phosphate	8	Amino Acid Metabolism	Glutamate metabolism	1.07062	-0.320025	0.853117	0.019669
307.057	14.4473	dCMP	8	Nucleotide Metabolism	Pyrimidine metabolism	-0.941323	0.159984	0.363898	0.0099864
307.084	14.0806	Glutathione	8	Amino Acid Metabolism	Glutamate metabolism	-0.857232	0.221188	-0.511267	0.010407
310.116	13.6578	Gamma-Glutamyltyrosine	7	Peptides	Undefined	-0.543046	0.0379111	-0.343831	0.018123
312.176	3.48889	N-Undecylbenzenesulfonic acid	5	Undefined	Undefined	0.79391	-0.0284799	0.533184	0.03506
319.138	16.6283	Glu-Ala-Thr	7	Peptide(tri-)	Acidic peptide	-0.760638	0.0623168	2.71319	7.3044e-05
320.051	16.3464	octulose 8-phosphate	5	Undefined	Undefined	-1.04139	0.0340583	-0.734826	0.0018692
321.1	13.2632	gamma-L-Glutamyl-L-cysteinyl-beta-alanine	7	Undefined	Undefined	-0.823378	0.142009	-1.03881	0.0080373
322.057	12.5763	dTMP	10	Nucleotide Metabolism	Pyrimidine metabolism	-0.748577	0.0973953	0.346605	0.045758
324.036	14.9361	UMP	10	Nucleotide Metabolism	Pyrimidine metabolism	-1.37287	-0.0556557	-0.77655	0.00015385
331.211	4.59343	Marimastat	5	Amino Acid Metabolism	Undefined	0.595449	-0.108954	0.195562	0.039832
346.222	12.4512	Ile-Lys-Ser	7	Peptide(tri-)	Basic peptide	1.56139	-0.53178	1.34656	0.010124
347.063	13.3042	AMP	10	Nucleotide Metabolism	Purine metabolism	-0.954648	0.0618382	-0.764074	0.0057552
359.165	4.49265	Enrofloxacin	7	Undefined	Undefined	0	10.0622	11.1231	1.0679e-07
363.058	16.5296	GMP	10	Nucleotide Metabolism	Purine metabolism	-2.61542	0.0435646	-2.01701	0.000245
387.024	15.8274	dCDP	10	Nucleotide Metabolism	Pyrimidine metabolism	-0.784037	0.381498	0.497549	0.016386
389.119	12.8576	Met-Cys-His	5	Peptide(tri-)	Basic peptide	0.241946	0.257789	2.12107	0.00065732
390.175	16.2281	Ala-Val-Asp-Ser	7	Peptide(tetra-)	Hydrophobic peptide	0.364125	0.198023	4.85085	4.459e-05
394.116	16.9591	Ala-Asp-Cys-Ser	7	Peptide(tetra-)	Acidic peptide	-0.791782	-0.0339324	-0.620264	0.043175
402.023	14.2579	dTDP	8	Nucleotide Metabolism	Pyrimidine metabolism	-1.20303	0.363872	0.496634	0.00070587
404.003	16.3629	UDP	6	Nucleotide Metabolism	Pyrimidine metabolism	1.35	0.11734	-0.617627	0.0050557
422.083	16.0283	alpha,alpha'-Trehalose 6-phosphate	7	Carbohydrate Metabolism	Starch and sucrose metabolism	1.31055	-0.0212866	1.58222	0.0050557
426.088	16.7009	Asp-Cys-Cys-Ser	5	Peptide(tetra-)	Acidic peptide	-1.23709	0.0240495	-0.780798	0.032771
427.03	14.731	ADP	8	Energy Metabolism	Oxidative phosphorylation	-0.673349	0.0512191	-0.703509	0.0084811
434.166	16.2121	Cys-Leu-Cys-Pro	5	Peptide(tetra-)	Hydrophobic peptide	0.670828	0.159863	4.42441	2.7706e-05
443.025	17.8964	GDP	8	Nucleotide Metabolism	Purine metabolism	-0.991643	0.00647633	-1.31684	0.010294
445.199	17.0371	Ala-Met-Gln-Pro	7	Peptide(tetra-)	Hydrophobic peptide	0	0	6.93997	1.0391e-09
447.196	16.1459	Asn-Leu-Asp-Ser	7	Peptide(tetra-)	Hydrophobic peptide	0	1.79517	7.61695	0.00022889
448.181	13.3636	Ala-Met-Met-Pro	7	Peptide(tetra-)	Hydrophobic peptide	0	0	6.60712	5.7954e-09
478.18	9.9673	glcNAc-1,6-anhMurNAc	8	Undefined	Undefined	0.287536	0.404753	3.58141	7.1851e-06
481.99	15.8118	dTTP	6	Nucleotide Metabolism	Pyrimidine metabolism	-0.775451	0.48783	0.664898	0.013528
484.28	3.58073	PG (16:0)	5	Lipids: Glycerophospholipids	Glycerophosphoglycerols	1.16223	-0.0750514	1.33933	0.018123
496.191	11.5589	Asn-Asn-Ser-Tyr	7	Peptide(tetra-)	Hydrophobic peptide	0.632821	0.699142	6.98693	2.7533e-06
524.176	18.899	Glu-Phe-Asp-Asp	7	Peptide(tetra-)	Hydrophobic peptide	-0.46103	0.0231738	-0.826536	0.022004
543.078	12.4761	NAD stem group	7	Undefined	Undefined	0.372413	0.117072	-0.490149	0.0066496
543.11	16.7196	CMP-3-deoxy-D-manno-octulosonate	8	Glycan Biosynthesis and Metabolism	Lipopolysaccharide biosynthesis	-2.66383	0.0744424	-2.11168	0.015691
548.081	13.7274	dTDP-6-deoxy-L-talose	7	Carbohydrate Metabolism	Nucleotide sugars metabolism	-0.584651	0.0523389	-0.259963	0.010407
573.141	12.4521	Biotinyl-5'-AMP	5	Metabolism of Cofactors and Vitamins	Biotin metabolism	0	0	7.77763	2.6441e-08
584.131	12.4158	C.I. Acid Blue 3	5	Undefined	Undefined	0	0	9.00456	2.6857e-09
596.672	16.2683	UDP-N-acetylmuramoyl-L-alanyl-D-glutamyl-6-carboxy-L-lysyl-D-alanyl- D-alanine	6	Amino Acid Metabolism	Peptidoglycan biosynthesis	-0.886139	0.214527	-0.215372	0.001522
605.077	18.1965	GDP-mannose	10	Carbohydrate Metabolism	Fructose and mannose metabolism	-4.58083	-0.0521211	-5.34769	0.0081258
607.081	14.9692	UDP-N-acetyl-D-galactosamine	9	Carbohydrate Metabolism	Aminosugars metabolism	-2.0656	0.0991245	-0.867813	7.4688e-05
639.038	16.7703	ADPribose 2'-phosphate	7	Undefined	Undefined	0	0	4.79601	8.9382e-08
663.109	13.4123	Fenugreekine	7	Nucleotide Metabolism	Undefined	-0.2297	0.132563	-0.473531	0.028807
672.474	3.30616	PA(34:2)	7	Lipids: Glycerophospholipids	Glycerophosphates	1.12206	0.264144	0.941003	0.0082653
733.563	3.47074	PC(32:0)	7	Lipids: Glycerophospholipids	Glycerophosphocholines	0.503476	0.0393926	0.0244172	0.04914
785.156	10.8576	FAD	8	Metabolism of Cofactors and Vitamins	Riboflavin metabolism	0.262135	0.00916365	-0.376686	0.003488
Supplementary Table 2: Signficiant metabolites identified in Pseudomonas aeruginosa12196 at 4 h following treatments with polymyxin B, enrofloxacin, and the combination. Metabolites confirmed by authentic standards were highlighted in yellow. Significant fold-changes are highlighed in red. One-way ANOVA for multiple comparison (q ≤ 0.05; |log2(fold change)| ³ 1).
MASS	RETENSION TIME	METABOLITE	CONFIDENCE	MAP	PATHWAY	Log2(fold change)
						Polymyxin B	Enrofloxacin	Combination	q-value
89.0477	14.8476	beta-Alanine	10	Nucleotide Metabolism	Pyrimidine metabolism	-0.217751	-0.0890947	-2.16815	4.0629e-05
97.9769	16.7363	Orthophosphate	5	Energy Metabolism	Oxidative phosphorylation	-0.523796	-0.228622	0.932885	0.0025519
103.063	10.7234	N,N-Dimethylglycine	8	Amino Acid Metabolism	Glycine, serine and threonine metabolism	0.197466	0.0297414	-0.426108	0.0042321
103.063	12.1752	(R)-3-Amino-2-methylpropanoate	7	Undefined	Undefined	0.202616	0.00770191	-0.186782	0.01733
103.1	19.9333	Choline	10	Amino Acid Metabolism	Glycine, serine and threonine metabolism	-0.237777	0.11968	-0.916106	0.0012165
104.047	9.6005	4-Hydroxybutanoic acid	7	Carbohydrate Metabolism	Butanoate metabolism	0.49127	0.410391	1.11581	0.017894
112.016	12.8913	2-Furoate	5	Undefined	Undefined	-4.60499	-3.47266	1.12638	0.012111
112.027	8.34445	Uracil	8	Nucleotide Metabolism	Pyrimidine metabolism	0.167683	0.180213	2.24637	0.0037984
113.048	7.17024	1-Pyrroline-2-carboxylate	5	Amino Acid Metabolism	Arginine and proline metabolism	0.0381401	0.492519	0.432464	0.019781
116.047	13.6052	5-Oxopentanoate	5	Amino Acid Metabolism	Lysine degradation	-0.351361	-0.0787096	-0.884511	0.013849
117.079	10.6743	L-Valine	8	Amino Acid Metabolism	Valine, leucine and isoleucine biosynthesis and degradation	-0.538531	-0.679166	-2.5791	3.5071e-05
117.079	12.0162	[FA amino(5:0)] 2S-amino-pentanoic acid	7	Amino Acid Metabolism	Amino Fatty Acids	0.0986958	0.144575	0.721115	0.019174
120.058	3.80463	Phenylacetaldehyde	6	Amino Acid Metabolism	Phenylalanine metabolism	0.418619	0.772876	-0.0753836	0.034381
122.048	7.17218	Nicotinamide	10	Metabolism of Cofactors and Vitamins	Nicotinate and nicotinamide metabolism	-0.215789	-0.710812	-2.35878	0.0053543
123.032	7.72201	Nicotinate	10	Metabolism of Cofactors and Vitamins	Nicotinate and nicotinamide metabolism	-0.311273	0.53606	3.1494	0.00059265
125.048	7.62864	N-Ethylmaleimide	7	Undefined	Undefined	-0.282729	0.651081	1.03022	0.019174
126.043	7.17273	Thymine	10	Nucleotide Metabolism	Pyrimidine metabolism	0.28086	1.24297	1.94625	0.0053543
126.043	11.5128	Imidazole-4-acetate	10	Amino Acid Metabolism	Histidine metabolism	-0.245226	-0.226814	-0.647218	0.0056816
129.079	11.8296	L-Pipecolate	9	Amino Acid Metabolism	Lysine degradation	0.362131	-0.000817121	-0.748001	0.019174
129.152	8.13275	Octylamine	7	Undefined	Undefined	0.026016	-0.116341	-0.439675	0.026367
130.063	5.56249	3-Oxo-4-methylpentanoic acid	7	Amino Acid Metabolism	Valine, leucine and isoleucine degradation	-0.162248	0.18418	1.72704	0.00058257
130.111	20.2239	N-Acetylputrescine	10	Amino Acid Metabolism	Arginine and proline metabolism	-0.535139	-0.649857	-2.13397	1.4927e-05
131.058	13.4544	5-Aminolevulinate	10	Amino Acid Metabolism	Glycine, serine and threonine metabolism	-0.219765	-0.339138	-0.927575	0.0032387
132.054	12.0064	3-Ureidopropionate	10	Nucleotide Metabolism	Pyrimidine metabolism	0.463909	0.261529	-2.09078	0.00074531
133.074	13.6704	1-deoxyxylonojirimycin	5	Undefined	Undefined	-0.450019	-0.379665	-0.864946	0.011901
133.074	15.7629	DL-&beta;-hydroxynorvaline	7	Undefined	Undefined	0.133719	0.0723411	-1.6859	0.0032387
138.043	10.8797	Urocanate	10	Amino Acid Metabolism	Histidine metabolism	0.156216	-0.145697	-0.439212	0.0053691
139.027	10.8196	6-Hydroxynicotinate	9	Metabolism of Cofactors and Vitamins	Nicotinate and nicotinamide metabolism	0.384623	0.509513	2.45134	0.00010679
141.043	15.3428	2-Aminomuconate semialdehyde	7	Amino Acid Metabolism	Tryptophan metabolism	2.38159	0.496876	1.29725	0.031255
143.058	11.3538	5-ethyl-5-methyl-2,4-oxazolidinedione	5	Undefined	Undefined	0.235864	1.82822	2.66848	0.00018383
146.069	12.0908	3-Ureidoisobutyrate	6	Nucleotide Metabolism	Pyrimidine metabolism	-0.159464	-0.0508337	0.57264	0.025939
147.053	14.5567	L-Glutamate	10	Amino Acid Metabolism	Arginine and proline metabolism	-0.282287	-0.468787	-1.155	0.00023921
151.049	16.5511	8-Hydroxyadenine	5	Undefined	Undefined	-1.1112	-0.69439	-0.36068	0.025043
159.053	12.0057	beta-Alanopine	7	Undefined	Undefined	1.01763	-0.486622	0.273604	0.048538
159.126	12.5084	Methacholine	5	Undefined	Undefined	0.393719	-0.0207599	-0.402197	0.010544
161.069	14.706	L-2-Aminoadipate	8	Amino Acid Metabolism	Lysine biosynthesis and degradation	-0.0868788	-0.398804	-1.34531	0.0036294
161.105	12.5835	L-Carnitine	9	Amino Acid Metabolism	Lysine degradation	0.213202	-0.173985	-1.13057	0.00098506
168.028	12.8092	Urate	8	Nucleotide Metabolism	Purine metabolism	0.562102	-0.315506	-0.787621	0.0053186
168.115	3.99834	FA (10:2)	7	Lipids: Fatty Acyls	Fatty Acids and Conjugates	0.182228	0.264963	-0.171064	0.035658
173.105	4.608	Hexanoylglycine	7	Undefined	Undefined	-0.685339	-0.184807	-0.692854	0.039755
174.064	14.4236	N-Formimino-L-glutamate	8	Amino Acid Metabolism	Histidine metabolism	-0.203858	-0.311142	-1.50293	0.00053661
174.101	12.8191	N-Acetylornithine	8	Amino Acid Metabolism	Arginine and proline metabolism	0.27593	-0.529797	-1.62718	0.019174
175.085	12.4692	Calystegin B2	7	Undefined	Undefined	-0.603334	-0.406287	-1.75975	0.00071478
176.08	11.5176	N5-formyl-N5-hydroxy-L-ornithine	8	Undefined	Undefined	-0.301687	-0.252005	-1.5656	0.026201
177.115	10.8804	Phenmetrazine	7	Undefined	Undefined	-0.0518646	-0.193909	-0.607817	0.0030774
181.06	11.8615	8-Hydroxy-7-methylguanine	7	Undefined	Undefined	0.111577	-0.342163	-0.232079	0.046433
181.074	12.716	L-Tyrosine	10	Amino Acid Metabolism	Tyrosine metabolism	0.240978	0.0358996	0.955839	0.01733
182.084	5.67216	Harman	7	Undefined	Undefined	0.962647	1.03796	1.4936	0.0016146
183.057	10.9305	Choline sulfate	8	Undefined	choline-O-sulfate degradation	0.299951	-0.162444	-0.675242	0.037161
185.993	16.943	3-Phospho-D-glycerate	8	Carbohydrate Metabolism	Glycolysis / Gluconeogenesis	-0.459281	-0.237015	-2.21148	0.0010251
187.048	12.9577	2-(Acetamidomethylene)succinate	7	Metabolism of Cofactors and Vitamins	Vitamin B6 metabolism	-0.441004	-0.352987	-1.26931	0.0032387
188.08	10.4798	N-Acetylglutamine	7	Undefined	Undefined	-0.808155	-0.339991	-1.35032	0.0017189
188.116	12.1078	6-Acetamido-3-aminohexanoate	7	Undefined	Undefined	0.07833	-0.269752	-0.62027	0.0039614
190.078	4.53877	Aldicarb	7	Undefined	Undefined	-1.60677	-0.828788	-7.98636	6.3661e-07
194.043	14.8118	D-Galacturonate	7	Carbohydrate Metabolism	Pentose and glucuronate interconversions	0.572432	-0.158844	1.04291	0.045466
194.106	5.58345	Laccarin	7	Undefined	Undefined	-0.338197	0.479142	1.11718	0.019174
195.075	16.7681	2-Amino-2-deoxy-D-gluconate	9	Carbohydrate Metabolism	Pentose phosphate pathway	-1.29279	0.14354	-0.0399077	0.027824
195.076	9.98969	2-Amino-4-hydroxy-6-hydroxymethyl-7,8-dihydropteridine	8	Metabolism of Cofactors and Vitamins	Folate biosynthesis	0.0034472	-0.870384	-0.555041	0.037008
197.08	10.0009	N-Acetyl-L-histidine	7	Undefined	Undefined	-0.504718	-0.314572	-1.35852	0.00097492
197.117	11.4619	Hercynine	7	Amino Acid Metabolism	Histidine metabolism	0.225215	-0.366239	-0.757387	0.0011769
202.095	12.7637	Proclavaminic acid	6	Biosynthesis of Secondary Metabolites	Clavulanic acid biosynthesis	0.0430876	-0.351443	0.852303	0.024314
203.079	12.8768	2-acetamidoglucal	5	Undefined	Undefined	-0.0355058	1.84482	2.70349	2.1605e-05
203.08	11.3498	N2-Acetyl-L-aminoadipate	5	Amino Acid Metabolism	Lysine biosynthesis	0.0753233	2.02922	2.82819	2.9554e-05
203.127	16.6425	Lys-Gly	5	Peptide(di-)	Basic peptide	-0.380772	0.510832	2.02625	0.006478
205.095	9.57438	N-Acetyl-D-fucosamine	7	Undefined	Undefined	-0.46084	-0.564934	-1.45817	0.0075758
208.062	14.6165	N-acetyl-demethylphophinothricin	5	Undefined	Undefined	-0.132718	-0.403931	-0.730327	0.040174
214.024	13.5882	2-Deoxy-D-ribose 5-phosphate	7	Carbohydrate Metabolism	Pentose phosphate pathway	-0.328946	-0.163978	-0.834778	0.0039141
217.143	16.0833	beta-Alanyl-L-lysine	7	Amino Acid Metabolism	beta-Alanine metabolism	-0.28989	0.725357	0.980194	0.021505
219.075	13.3078	O-Succinyl-L-homoserine	10	Amino Acid Metabolism	Methionine metabolism	3.36929	0.352871	1.70597	0.00049287
220.058	13.9414	dihomocitrate	5	Undefined	Undefined	-1.07297	-0.41697	-0.870937	0.046074
221.09	11.3521	N-Acetyl-D-glucosamine	6	Amino Acid Metabolism	Aminosugars metabolism	0.0774949	2.05922	2.83277	4.2194e-05
221.09	12.8644	N-Acetyl-beta-D-glucosamine	6	Undefined	chitobiose degradation	-0.0216785	1.96116	2.80888	2.9554e-05
221.108	8.5997	CAPS	7	Medium Component	Undefined	0.183269	-0.0203591	-0.361568	0.039755
227.091	9.89258	Deoxycytidine	8	Nucleotide Metabolism	Pyrimidine metabolism	0.758447	1.06274	2.0416	0.0017351
229.088	14.524	Ergothioneine	7	Amino Acid Metabolism	Histidine metabolism	-0.802232	-0.848482	-2.06339	0.019174
230.019	15.5823	D-Ribose 5-phosphate	10	Carbohydrate Metabolism	Pentose phosphate pathway	-0.359784	-0.0295265	1.47065	0.0045839
233.138	16.6601	Lys-Ser	7	Peptide(di-)	Basic peptide	-0.88703	-0.0832309	1.57286	0.019781
237.085	12.9123	N-Acetyl-D-glucosaminate	5	Undefined	Undefined	-1.20213	-1.00482	0.994204	0.038634
238.132	4.59346	Secobarbital	7	Undefined	Undefined	0.472578	0.0604473	-0.0867698	0.026367
242.08	7.11995	Lumichrome	7	Metabolism of Cofactors and Vitamins	Riboflavin metabolism	0.488663	0.248439	-0.985303	0.017901
242.091	7.1709	Thymidine	7	Nucleotide Metabolism	Pyrimidine metabolism	-0.0259077	1.02231	1.43219	0.0084585
242.188	3.76909	FA oxo(14:0)	5	Lipids: Fatty Acyls	Fatty Acids and Conjugates	-1.16336	0.326217	1.57736	0.0003114
243.122	12.37	Ala-Gly-Pro	5	Peptide(tri-)	Polar peptide	-0.0566121	-0.331461	1.30019	0.025043
243.162	4.17699	Isobutylphendienamide	7	Undefined	Undefined	1.48472	0.303382	3.05425	0.00059265
244.204	3.73573	2S-Hydroxytetradecanoic acid	5	Lipids: Fatty Acyls	Fatty Acids and Conjugates	0.126533	0.120331	2.07742	0.0077908
246.051	12.5693	2-deoxyglucose-6-phosphate	7	Undefined	Undefined	-0.446283	1.30641	2.54931	0.00053661
246.133	16.51	N2-(D-1-Carboxyethyl)-L-arginine	7	Amino Acid Metabolism	Arginine and proline metabolism	0.0258714	0.371727	1.7467	0.0012667
248.056	14.7613	Pyridoxamine phosphate	6	Metabolism of Cofactors and Vitamins	Vitamin B6 metabolism	0.443867	0.0377368	-0.441649	0.027666
254.225	3.58372	FA(16:1)	5	Lipids: Fatty Acyls	Fatty acid biosynthesis	-0.519028	0.292899	1.29592	0.039755
256.117	11.138	Histidinyl-Threonine	7	Peptides	Undefined	0.873512	0.196653	1.05776	0.025431
259.046	16.1003	alpha-D-Glucosamine 1-phosphate	6	Carbohydrate Metabolism	Aminosugars metabolism	-0.594171	-0.196592	1.74339	0.0037984
259.157	4.06411	2-Heptyl-4-hydroxyquinoline-N-oxide	5	Undefined	Undefined	1.74196	-0.266136	2.0159	0.00018383
259.19	12.5948	Ile-Lys	7	Peptide(di-)	Basic peptide	-0.356597	0.102967	1.51347	0.026367
260.012	11.7794	S-Methyl-5-thio-D-ribose 1-phosphate	8	Amino Acid Metabolism	Methionine metabolism	1.03784	-0.600136	-0.0463924	0.039755
260.03	16.6996	Hexose phosphate	7	Carbohydrate Metabolism	Undefined	-0.511272	-0.124145	1.49811	0.00013377
266.155	3.49105	sodium dodecyl sulfate	7	Undefined	Undefined	0.145809	-0.53142	-1.63139	0.0021083
268.203	3.86353	FA oxo(16:2)	7	Lipids: Fatty Acyls	Octadecanoids	-0.616245	-0.00572893	0.458481	0.0052654
272.235	3.67509	FA hydroxy(16:0)	7	Lipids: Fatty Acyls	Fatty Acids and Conjugates	-0.0120797	0.0543683	1.71991	0.00042427
275.1	7.77819	Cardiospermin	7	Undefined	Undefined	0.104364	1.82849	2.59998	2.9874e-05
275.1	6.42011	Sarmentosin	7	Undefined	Undefined	0.426808	2.01835	3.22725	0.00017534
275.148	16.38	Epsilon-(gamma-Glutamyl)-lysine	7	Undefined	Undefined	-0.280677	0.755342	2.22835	0.0032387
275.188	2.82204	Citronellyl anthranilate	7	Lipids: Prenols	Undefined	-0.00797728	-0.0421739	-0.349215	0.039755
276.096	17.2381	Glu-Glu	7	Peptide(di-)	Acidic peptide	-0.589415	-0.796223	-1.97413	0.0012667
278.13	4.6705	Pantetheine	7	Metabolism of Cofactors and Vitamins	Pantothenate and CoA biosynthesis	-1.1725	-0.25035	-4.82307	0.045325
280.24	3.62551	FA (18:2)	7	Lipids: Fatty Acyls	Fatty Acids and Conjugates	0.00346926	0.567873	1.97315	0.0030774
281.271	3.70916	FA (18:1)	7	Lipids: Fatty Acyls	Fatty amides	-0.707829	-0.61748	-2.16948	0.019174
283.193	3.98138	Levallorphan	5	Undefined	Undefined	2.11957	-0.055588	1.88796	0.00053661
287.159	12.8686	Arginyl-Hydroxyproline	5	Peptides	Undefined	4.16483	4.50845	6.77699	0.0038592
287.188	3.89573	Isolobinine	7	Undefined	Undefined	1.63007	-0.515348	1.71165	0.00068391
289.139	16.7059	Asp-Arg	5	Peptide(di-)	Basic peptide	-0.259015	0.175827	1.16553	0.019174
290.04	16.3408	D-Sedoheptulose 7-phosphate	6	Carbohydrate Metabolism	Pentose phosphate pathway	-0.170102	-0.279023	1.75344	0.0032387
290.041	12.9181	Sedoheptulose 1-phosphate	5	Energy Metabolism	Carbon fixation	-3.13035	-3.13035	2.59333	0.019174
293.111	9.98394	N-Acetylmuramate	6	Undefined	Undefined	0.322429	3.81893	4.951	6.2107e-05
294.219	3.6403	FA hydroxy(18:1)	7	Lipids: Fatty Acyls	Fatty Acids and Conjugates	-0.16358	-0.437791	-1.44893	0.012988
296.235	3.73149	FA hydroxy (18:2)	5	Lipids: Fatty Acyls	Fatty Acids and Conjugates	-0.160616	0.0564417	0.953416	0.046433
296.271	3.50645	FA (19:1)	7	Lipids: Fatty Acyls	Fatty Acids and Conjugates	0.121685	0.742606	1.41004	0.0086333
297.266	3.63097	3-Ketosphingosine	5	Undefined	Undefined	-0.0702957	0.602324	2.24568	0.0010746
298.251	3.62679	FA oxo(18:0)	7	Lipids: Fatty Acyls	Fatty Acids and Conjugates	-0.100091	0.533863	2.25764	0.00064394
299.225	3.8621	2-Undecyl-4(1H)-quinolinone	5	Undefined	Undefined	1.85098	-0.320415	1.94721	0.00066342
301.056	14.4323	N-Acetyl-D-glucosamine 6-phosphate	8	Amino Acid Metabolism	Glutamate metabolism	0.465327	0.802755	-0.896665	0.047384
307.057	14.4473	dCMP	8	Nucleotide Metabolism	Pyrimidine metabolism	-0.30028	0.816857	1.09889	0.0042532
314.246	3.75873	FA hydroxy(18:1)	7	Lipids: Fatty Acyls	Fatty Acids and Conjugates	-0.429593	0.281261	1.70019	0.0037984
315.277	3.6151	Dehydrophytosphingosine	5	Lipids: Sphingolipids	Sphingoid bases	-0.0114764	0.341406	1.71499	0.0043121
317.159	10.3964	Glu-Ala-Val	7	Peptide(tri-)	Hydrophobic peptide	-0.692737	-0.300615	-0.746031	0.017894
319.138	16.6283	Glu-Ala-Thr	7	Peptide(tri-)	Acidic peptide	-0.503805	0.369402	1.99771	0.0018929
319.215	3.60637	homocapsaicin	7	Undefined	Undefined	1.11175	1.0846	1.96281	0.019781
320.051	16.3464	octulose 8-phosphate	5	Undefined	Undefined	0.151787	-0.10449	1.64807	0.01319
321.1	13.2632	gamma-L-Glutamyl-L-cysteinyl-beta-alanine	7	Undefined	Undefined	-0.699827	-0.330668	-2.0473	0.0071869
322.057	12.5763	dTMP	10	Nucleotide Metabolism	Pyrimidine metabolism	-0.315876	0.911945	1.81887	0.0011185
347.063	13.3042	AMP	10	Nucleotide Metabolism	Purine metabolism	-0.486334	-0.317613	-1.37418	0.0039711
358.096	9.61473	Pantetheine 4'-phosphate	8	Metabolism of Cofactors and Vitamins	Pantothenate and CoA biosynthesis	-0.44798	-0.212809	-1.03852	0.0042744
359.165	4.49265	Enrofloxacin	7	Undefined	Undefined	0	10.4012	11.6281	1.8397e-10
384.122	12.6948	S-Adenosyl-L-homocysteine	10	Amino Acid Metabolism	Methionine metabolism	0.0878943	0.00832239	-0.209186	0.0301
387.024	15.8274	dCDP	10	Nucleotide Metabolism	Pyrimidine metabolism	-0.376135	0.600175	1.78075	0.0034186
389.119	12.8576	Met-Cys-His	5	Peptide(tri-)	Basic peptide	0.445	2.24859	3.12936	1.4927e-05
390.175	16.2281	Ala-Val-Asp-Ser	7	Peptide(tetra-)	Hydrophobic peptide	0.402998	4.5002	6.18888	7.2295e-07
394.116	16.9591	Ala-Asp-Cys-Ser	7	Peptide(tetra-)	Acidic peptide	-0.993087	-0.42357	-1.33482	0.035452
404.002	19.2372	UDP	6	Nucleotide Metabolism	Pyrimidine metabolism	2.48036	-0.373963	1.27373	0.0045839
404.191	12.5855	alcaligin	7	Undefined	Undefined	1.3468	5.69669	6.59614	0.0024521
410.244	3.8403	LysoPA(16:0)	7	Lipids: Glycerophospholipids	Glycerophosphates	0.739555	-0.288537	-0.868576	2.9554e-05
434.166	16.2121	Cys-Leu-Cys-Pro	5	Peptide(tetra-)	Hydrophobic peptide	0.489333	4.16113	5.63475	5.367e-06
436.26	3.79471	PA(18:1(9Z)/0:0)	5	Lipids: Glycerophospholipids	Glycerophospholipid metabolism	0.854516	-0.258723	-5.09902	0.015531
445.199	17.0371	Ala-Met-Gln-Pro	7	Peptide(tetra-)	Hydrophobic peptide	0	5.20671	7.62296	2.9554e-05
447.196	16.1459	Asn-Leu-Asp-Ser	7	Peptide(tetra-)	Hydrophobic peptide	0	6.05741	8.35631	6.4833e-07
448.181	13.3636	Ala-Met-Met-Pro	7	Peptide(tetra-)	Hydrophobic peptide	0	5.1027	5.48305	5.3732e-06
456.104	10.7994	FMN	8	Energy Metabolism	Oxidative phosphorylation	0.0594775	-0.312067	-1.36979	0.00097492
461.213	15.5669	Asn-Glu-Ile-Ser	7	Peptide(tetra-)	Hydrophobic peptide	0	8.27958	10.0955	1.9382e-08
467.301	4.2332	LysoPC(14:0)	7	Lipids: Glycerophospholipids	Glycerophosphocholines	0.301215	-0.323125	-2.3788	8.576e-06
478.18	9.9673	glcNAc-1,6-anhMurNAc	8	Undefined	Undefined	0.249543	3.2195	5.40702	1.4639e-05
479.301	4.03167	LysoPE(18:1)	7	Lipids: Glycerophospholipids	Glycerophosphoethanolamines	0.511906	-0.12099	0.599146	0.035658
484.28	3.58073	PG (16:0)	5	Lipids: Glycerophospholipids	Glycerophosphoglycerols	0.783428	0.50406	1.12157	0.0071869
495.333	4.08365	LysoPC(16:0)	7	Lipids: Glycerophospholipids	Glycerophosphocholines	0.242193	-0.606888	-1.94639	0.00064394
496.191	11.5589	Asn-Asn-Ser-Tyr	7	Peptide(tetra-)	Hydrophobic peptide	0.408346	6.20882	8.32806	1.4639e-05
501.665	7.17153	trans-Hexadec-2-enoyl-CoA	5	Lipid Metabolism	Fatty acid metabolism	-1.08569	0.778474	0.760172	0.030981
501.665	4.59771	Palmitelaidoyl-CoA	5	Undefined	Undefined	-1.38724	0.586584	0.884447	0.023761
510.296	3.54687	PG (18:1)	7	Lipids: Glycerophospholipids	Glycerophosphoglycerols	1.04027	0.382577	2.26513	0.0019133
521.348	4.00606	LysoPC(18:1)	5	Lipids: Glycerophospholipids	Glycerophosphocholines	0.191482	-0.497338	-1.66239	0.00024039
523.363	3.97689	PC(18:0)	7	Lipids: Glycerophospholipids	Glycerophosphocholines	0.231106	-0.411745	-1.09791	0.0039331
525.307	3.77051	PS(18:0)	7	Lipids: Glycerophospholipids	Glycerophosphoserines	0.309609	-0.27035	-0.890578	0.019781
541.06	13.4085	Cyclic ADP-ribose	5	Undefined	Undefined	-0.0828458	-0.483024	-2.66211	0.00084467
543.11	16.7196	CMP-3-deoxy-D-manno-octulosonate	8	Glycan Biosynthesis and Metabolism	Lipopolysaccharide biosynthesis	-3.02937	-2.75719	2.00014	0.026502
562.387	3.4112	Cholesterolglucuronide	5	Lipids: Sterol lipids	Pentose and glucuronate interconversions	-0.064949	-0.451369	-1.39557	0.011275
563.056	15.7384	UDP-L-Ara4FN	8	Carbohydrate Metabolism	Nucleotide sugars metabolism	2.95163	0.107436	0.794846	0.030578
573.141	12.4521	Biotinyl-5'-AMP	5	Metabolism of Cofactors and Vitamins	Biotin metabolism	0	6.1276	7.26698	1.4927e-05
584.131	12.4158	C.I. Acid Blue 3	5	Undefined	Undefined	0	7.80055	9.05734	2.9969e-06
596.672	16.2683	UDP-N-acetylmuramoyl-L-alanyl-D-glutamyl-6-carboxy-L-lysyl-D-alanyl- D-alanine	6	Amino Acid Metabolism	Peptidoglycan biosynthesis	-0.655332	0.0177565	1.45079	0.0025459
600.328	3.80058	PI(18:0)	5	Lipids: Glycerophospholipids	Glycerophosphoinositols	0.146226	-0.408313	-1.05579	0.0018929
602.526	3.24156	1-(14-methyl-pentadecanoyl)-2-(8-[3]-ladderane-octanyl)-sn-glycerol	5	Lipids: Glycerolipids	Diradylglycerols	0.348921	-0.131514	-0.0751069	0.028997
605.077	18.1965	GDP-mannose	10	Carbohydrate Metabolism	Fructose and mannose metabolism	-4.75839	-3.03405	0.993234	0.0028983
607.081	14.9692	UDP-N-acetyl-D-galactosamine	9	Carbohydrate Metabolism	Aminosugars metabolism	-0.457473	-0.673986	2.44888	0.00074531
614.396	7.90222	PA(30:3)	7	Lipids: Glycerophospholipids	Glycerophosphates	0.201507	-0.0546891	-0.33757	0.039755
614.398	5.03088	[PR] Amarouciaxanthin A	7	Lipids: Prenols	Isoprenoids	0.195413	0.190305	-0.675314	0.026201
639.038	16.7703	ADPribose 2'-phosphate	7	Undefined	Undefined	-0.198828	3.64767	7.90967	0.0045839
663.109	13.4123	Fenugreekine	7	Nucleotide Metabolism	Undefined	-0.161079	-0.554212	-2.90732	0.00072386
689.498	3.84726	PC(29:1)	7	Lipids: Glycerophospholipids	Glycerophosphocholines	0.236519	-0.1144	-0.430867	0.01319
689.499	3.44749	PE(32:1)	5	Lipids: Glycerophospholipids	Glycerophosphoethanolamines	0.187471	-0.00174709	-0.342969	0.02478
701.495	3.24332	CL(50:2)	7	Lipids: Glycerophospholipids	Undefined	1.4269	-0.0628193	0.38376	0.0012667
702.502	3.24931	1',3'-Bis-[1-hexadecanoyl-2-(11Z-octadecenoyl)-sn-glycero-3-phospho]-sn-glycerol	5	Lipids: Glycerophospholipids	Glycerophosphoglycerophosphoglycerols	1.34572	-0.172058	0.280847	0.0038612
715.514	3.42157	PE(34:2)	7	Lipids: Glycerophospholipids	Glycerophosphoethanolamines	0.312255	-0.0163336	-0.184664	0.036046
722.51	3.25675	PG(32:0)	7	Lipids: Glycerophospholipids	Glycerophosphoglycerols	-0.118861	0.0688699	-1.22317	0.00017155
729.531	3.43315	PC(32:2)	5	Lipids: Glycerophospholipids	Glycerophosphocholines	0.18058	0.197793	-0.674935	0.0032387
731.546	3.45835	PE(35:1)	5	Lipids: Glycerophospholipids	Glycerophosphoethanolamines	0.264477	0.0602025	-0.640263	0.002157
733.563	3.47074	PC(32:0)	7	Lipids: Glycerophospholipids	Glycerophosphocholines	-0.0637278	0.0352942	-0.937582	0.0024521
735.505	3.25958	PS(32:0)	5	Lipids: Glycerophospholipids	Glycerophosphoserines	0.0177984	-0.370252	-0.348855	0.022543
744.495	3.25684	PG(34:3)	5	Lipids: Glycerophospholipids	Glycerophosphoglycerols	-0.151534	-0.34864	-1.30135	0.0024521
745.091	16.9193	NADPH	8	Energy Metabolism	Glutathione metabolism	-0.454009	-0.65566	-5.57173	0.0010989
746.511	3.25814	[PR] 1'-Hydroxy-4-keto-gamma-carotene glucoside/ 1'-OH-4-Keto-gamma-carotene glucoside/ (Carotenoid K-G)	7	Lipids: Prenols	Isoprenoids	0.354878	-0.101467	-0.338137	0.018631
748.526	3.25475	PG(34:1)	7	Lipids: Glycerophospholipids	Glycerophosphoglycerols	0.477403	0.123962	-0.0930611	0.0055484
772.527	3.25178	PG(36:3)	7	Lipids: Glycerophospholipids	Glycerophosphoglycerols	-0.0313874	-0.016869	-1.01254	0.0050466
785.156	10.8576	FAD	8	Metabolism of Cofactors and Vitamins	Riboflavin metabolism	0.103948	-0.299554	-1.07395	0.00041641
809.126	11.6587	Acetyl-CoA	8	Carbohydrate Metabolism	Citrate cycle (TCA cycle) and Fatty acid biosynthesis	-0.0817536	-0.976132	-2.26511	0.0051323
867.168	11.4409	(2S,3S)-3-Hydroxy-2-methylbutanoyl-CoA	8	Amino Acid Metabolism	Valine, leucine and isoleucine degradation	0.0806295	-0.575622	-0.761329	0.049627
